# Supplementary material
Source: Springer Nature journal article supplement (https://www.springermedizin.de/resource/supplementary/12969_2012_949_MOESM4_ESM.pdf/9588828)

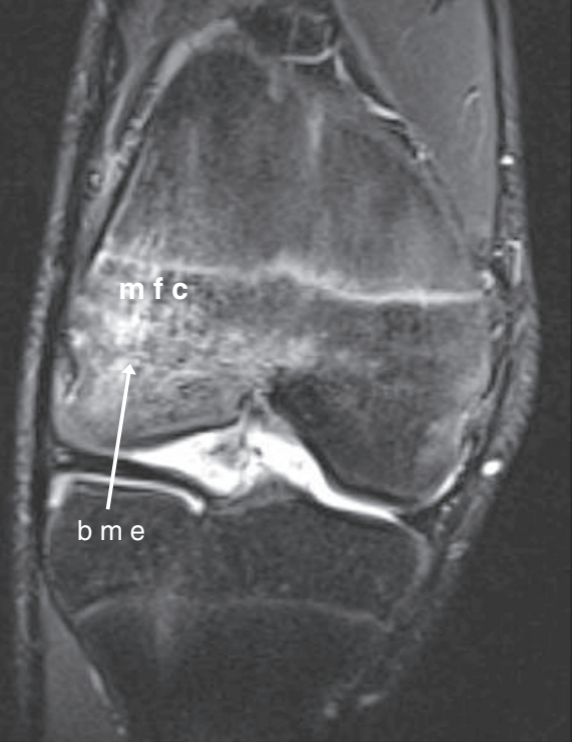

m f c

b m e

Supplement: MOESM4 [file 9588828]
